# Supplementary material
Source: publisher figshare collection journal article supplement (https://frontiersin.figshare.com/ndownloader/files/24191675)
Supplement: Supplementary file 1 [file 24191675]

| **Pre-monsoon** | | | |  | **Monsoon** | | | |  | **Post-monsoon** | | | | |
| --- | --- | --- | --- | --- | --- | --- | --- | --- | --- | --- | --- | --- | --- | --- |
|  | **F-1** | **F-2** | **F-3** |  |  | **F-1** | **F-2** | **F-3** |  |  | **F-1** | **F-2** | **F-3** | **F-4** |
| pH | **-0.84** | -0.06 | -0.07 |  | TSM | **0.90** | -0.07 | 0.23 |  | Sal | **-0.89** | -0.24 | 0.12 | -0.11 |
| DO | **0.81** | -0.37 | 0.19 |  | SiO4 | **0.89** | -0.12 | 0.17 |  | pH | **-0.84** | -0.07 | -0.20 | 0.21 |
| Sal | **-0.79** | -0.28 | -0.05 |  | WT | **-0.77** | -0.07 | **0.43** |  | DO | **0.75** | 0.29 | 0.11 | 0.30 |
| Chl-a | **0.79** | 0.13 | 0.08 |  | NH4 | **0.59** | 0.24 | 0.29 |  | TSM | **0.70** | -0.28 | -0.15 | 0.08 |
| NO3 | **0.61** | 0.27 | -0.37 |  | PO4 | 0.01 | **0.90** | 0.15 |  | NO2 | -0.14 | **0.82** | -0.05 | -0.09 |
| NO2 | **0.51** | 0.15 | 0.17 |  | NO3 | 0.04 | **0.86** | 0.04 |  | NO3 | 0.40 | **0.65** | -0.38 | -0.05 |
| WT | 0.00 | **-0.93** | 0.02 |  | Chl-a | -0.30 | **0.70** | **0.42** |  | NH4 | 0.31 | **0.59** | -0.12 | 0.19 |
| TSM | 0.24 | **0.82** | -0.04 |  | NO2 | 0.21 | **0.57** | 0.29 |  | WT | -0.22 | -0.12 | **0.78** | 0.16 |
| NH4 | 0.14 | 0.10 | **0.82** |  | DO | 0.00 | 0.21 | **0.88** |  | PO4 | 0.36 | -0.13 | **0.76** | -0.02 |
| PO4 | **0.46** | -0.08 | **0.75** |  | pH | -0.21 | -0.20 | **-0.77** |  | Chl-a | -0.07 | 0.19 | 0.28 | **0.81** |
| SiO4 | 0.36 | 0.36 | **-0.52** |  | Sal | -0.55 | -0.32 | **-0.70** |  | SiO4 | 0.29 | -0.42 | -0.18 | **0.66** |
| **Eigenvalues** | **3.92** | **2.18** | **1.29** |  | **Eigenvalues** | **4.13** | **2.73** | **1.27** |  | **Eigenvalues** | **3.32** | **2.06** | **1.35** | **1.14** |
| **% of Variance** | **35.67** | **19.85** | **11.76** |  | **% of Variance** | **37.55** | **24.82** | **11.58** |  | **% of Variance** | **30.20** | **18.75** | **12.25** | **10.40** |
| **Cumulative %** | **35.67** | **55.52** | **67.27** |  | **Cumulative %** | **37.55** | **62.37** | **73.95** |  | **Cumulative %** | **30.20** | **48.95** | **61.20** | **71.60** |

**Table S3 Factor analysis of different environmental variables off Rushikulya Estuary**
